# Supplementary material for: Evaluation of ultrasound-guided lateral thoracolumbar interfascial plane block for postoperative analgesia in lumbar spine fusion surgery: a prospective, randomized, and controlled clinical trial
Source: PeerJ. 2019 Oct 28;7:e7967. doi: 10.7717/peerj.7967 (PMC6822594; doi:10.7717/peerj.7967)
Supplement: Supplemental Information 1 [file peerj-07-7967-s001.xlsx]

## Sheet: Sheet1
name	age	gender	weight	height	BMI	ASA	surgical time	anesthesia time	propofol	sufentanil	remifentanil	Nerve block point	nausea or vomiting	Skin pruritus	Respiratory depression	Sleepiness	PCA comprssions	Remedial analgesic administration	move time	postoperation 1h	postoperation 12h	postoperation 24h	postoperation 36h	postoperation 48h	rest time	postoperation 1h	postoperation 12h	postoperation 24h	postoperation 36h	postoperation 48h	hospital stay time	Postoperative days in hospital bed	BCS 1h	BCS 12h	BCS 24h	BCS 36h	BCS 48h
1	68	M	65	175	21.2245	II	240	260	726	50	1740	T12	1	0	0	0	3	0		1	4	5	3	3		1	2	1	1	2	5	12	3	2	2	2	2
2	53	M	63.5	170	21.9723	II	210	240	517	25	0	T12	0	0	0	0	4	0		1	2	3	4	4		1	2	2	2	1	6	11	3	1	2	2	2
3	70	M	57	164	21.1927	II	260	280	734	25	0	T12	0	0	0	0	3	0		1	2	3	3	4		1	2	1	3	1	5	10	2	2	2	2	3
4	61	F	60	160	23.4375	I	180	230	427	25	812	T12	0	0	0	1	4	0		1	1	3	3	4		1	1	3	3	2	7	11	3	1	1	2	3
5	52	F	60	160	23.4375	II	200	240	442	25	1107	T12	0	0	0	0	3	0		1	1	1	1	3		1	1	1	4	2	6	12	3	2	2	3	3
6	64	F	55	163	20.7008	II	220	250	435	25	0	T12	0	0	0	0	4	0		1	1	2	3	4		0	1	2	3	1	5	11	2	1	2	1	2
7	67	M	77	175	25.1429	II	140	180	431	25	0	T12	0	0	0	0	4	0		1	1	2	1	4		0	1	2	2	1	5	11	3	1	2	2	3
8	65	M	72	177	22.9819	II	140	190	283	25	0	T12	0	0	0	0	3	0		1	1	1	3	4		0	1	1	3	1	5	10	2	2	2	3	3
9	31	M	80	180	24.6914	II	160	200	450	25	982	T12	0	0	0	0	2	0		1	3	3	4	3		1	3	2	3	2	6	12	3	2	2	2	3
10	46	F	55	166	19.9594	II	140	190	546	25	546	T12	0	1	0	0	3	0		1	1	1	3	4		1	1	1	2	2	5	11	3	2	1	2	3
11	66	M	70	170	24.2215	II	160	200	533	25	1292	T12	0	0	0	1	4	0		2	1	2	1	4		1	1	2	2	2	5	10	3	2	3	2	3
12	65	M	65	168	23.03	II	140	160	472	25	0	T12	0	0	0	0	4	0		1	1	1	3	4		1	1	1	3	2	6	11	3	2	3	2	3
13	59	M	59	165	21.6713	I	140	180	589	35	0	T12	0	0	0	0	5	0		2	1	1	1	4		1	1	1	3	2	7	11	4	3	2	2	3
14	52	M	65	175	21.2245	II	210	230	678	25	0	T12	0	0	0	0	3	0		1	1	2	3	4		1	1	3	2	2	6	10	3	2	2	2	3
15	46	F	57	153	24.3496	II	130	160	426	25	0	T12	1	0	0	0	4	0		1	1	1	1	4		1	1	1	3	1	6	12	2	3	3	3	2
16	48	F	53	150	23.5556	II	140	170	368	35	937	T12	0	0	0	1	3	0		1	1	1	3	4		1	1	1	3	2	5	11	3	2	3	2	3
17	54	F	54	160	21.0938	II	140	170	345	25	0	T12	0	0	1	0	4	0		1	1	2	1	4		1	1	2	2	1	5	10	2	3	3	3	2
18	53	M	53	160	20.7031	II	140	170	459	25	0	T12	0	1	0	0	4	0		1	1	2	2	4		1	1	2	3	2	6	10	3	2	2	2	3
19	55	M	65	170	22.4913	II	240	260	733	25	0	T12	0	0	0	0	3	0		1	1	1	1	4		1	1	1	2	2	5	11	2	3	2	2	3
20	54.5	F	54.5	152	23.589	I	180	210	671	25	1661	T12	1	0	0	0	3	0		1	1	1	3	4		1	1	1	3	1	6	12	2	3	2	3	2
21	68	F	60	158	24.0346	II	120	140	402	20	0	T12	0	0	0	0	5	1		1	1	1	1	3		1	1	1	4	1	5	11	3	2	2	3	2
22	63	F	54	168	19.1327	II	240	260	834	25	0	T12	0	0	0	0	6	1		2	1	1	1	3		1	1	1	4	1	5	11	3	2	2	2	2
23	64	M	64	164	23.7954	II	170	190	676	25	0	T12	0	0	0	0	4	0		1	1	1	3	3		1	1	1	2	1	6	12	3	2	1	2	3
24	65	F	65	156	26.7094	I	180	200	668	25	0	T12	0	0	0	1	4	0		1	1	1	1	4		1	1	1	2	1	5	11	3	2	3	2	2
25	61	M	66	165	24.2424	II	175	195	698	25	127	T12	0	0	0	0	3	0		1	2	2	1	1		1	1	1	2	1	5	10	3	2	2	2	2
26	62	F	56	160	21.875	II	180	210	588	25	913	T12	1	0	0	0	4	0		1	1	1	1	3		1	1	1	2	2	5	11	3	2	3	2	2
27	59	F	57	158	22.8329	II	140	220	598	30	0	T12	0	0	0	1	5	2		1	2	2	1	2		1	1	1	1	1	6	12	3	2	2	2	2
28	62	M	63	170	21.7993	I	165	190	546	25	0	T12	0	1	0	0	4	1		1	1	2	1	1		1	1	1	1	1	6	11	3	3	3	3	3
29	63	M	66	172	22.3094	II	155	210	534	30	267	T13	0	0	1	0	5	1		1	2	1	1	1		1	1	2	1	1	6	12	2	3	3	3	3
30	63	F	65	168	23.03	II	160	200	512	25	411	T12	1	0	0	0	6	1		1	2	2	1	1		1	2	2	1	1	5	11	3	3	3	3	3
name	age	gender	weight	height	BMI	ASA	surgical time	anesthesia time	propofol	sufentanil	remifentanil	Nerve block point	nausea or vomiting	Skin pruritus	Respiratory depression	Sleepiness	PCA comprssions	Remedial analgesic administration	move time	postoperation 1h	postoperation 12h	postoperation 24h	postoperation 36h	postoperation 48h	rest time	postoperation 1h	postoperation 12h	postoperation 24h	postoperation 36h	postoperation 48h	Postoperative days in hospital bed	hospital stay time	BCS 1h	BCS 12h	BCS 24h	BCS 36h	BCS 48h
1	53	F	75	160	29.2969	II	150	200	673	45	1182	T12	0	0	1	0	8	0		3	3	3	4	4		1	4	4	3	2	6	13	3	2	1	2	3
2	42	F	42	158	16.8242	I	180	230	596	35	1490	T12	0	0	0	0	7	0		2	3	4	4	4		1	3	5	3	1	7	13	3	2	3	2	3
3	63	M	80	170	27.6817	II	180	220	1025	40	2173	T12	0	0	0	1	7	0		1	4	4	4	5		1	4	4	3	2	6	13	3	2	3	2	3
4	73	M	85	170	29.4118	II	150	180	699	35	1224	T12	0	0	0	1	8	1		1	4	4	3	5		1	4	4	2	1	7	14	4	3	2	2	3
5	63	F	50	155	20.8117	II	150	180	585	40	995	T12	1	0	0	1	5	0		1	3	3	4	5		1	3	3	3	1	6	12	3	2	2	2	3
6	40	M	81	173	27.0641	I	120	150	610	45	1224	T12	1	0	0	0	7	0		1	1	4	3	4		1	1	4	3	2	7	13	2	2	1	3	2
7	39	M	70	163	26.3465	II	210	240	832	50	1751	T12	1	0	0	0	7	0		1	4	4	2	4		1	4	4	4	2	7	12	3	2	3	2	3
8	43	M	82	176	26.4721	II	220	250	1117	65	1117	T12	0	0	0	0	6	0		1	4	4	3	4		1	4	4	3	2	6	13	2	1	1	1	2
9	45	F	65	168	23.03	I	120	150	439	40	1073	T12	0	0	0	0	8	1		0	3	3	3	4		0	3	3	2	1	7	12	3	1	2	2	1
10	21	M	70	170	24.2215	II	150	180	603	35	1507	T12	1	0	0	0	7	0		0	4	4	2	4		0	4	4	3	1	7	14	3	2	2	1	2
11	49	F	50	160	19.5312	II	140	170	654	40	1070	T12	0	0	0	0	7	1		0	4	4	3	4		0	5	5	4	2	7	13	3	2	2	1	2
12	52	F	53	160	20.7031	I	150	180	733	35	1083	T12	0	1	0	0	7	0		0	4	4	3	5		0	4	4	3	1	7	12	3	2	2	2	2
13	47	M	60	165	22.0386	II	150	170	617	35	1542	T12	0	0	0	0	6	0		0	4	4	3	4		0	4	4	4	2	5	14	2	2	1	1	2
14	48	F	70	165	25.7117	II	160	180	741	35	1483	T12	0	0	0	0	7	1		1	4	5	3	5		1	4	5	2	2	5	12	3	2	2	1	2
15	54	M	85	175	27.7551	II	160	180	562	35	1373	T12	0	0	0	0	6	0		1	4	5	4	4		1	4	5	3	1	7	13	3	3	2	2	2
16	65	F	55	155	22.8928	II	120	150	391	40	1149	T12	0	0	0	0	7	2		1	4	5	4	4		1	5	5	3	2	6	12	3	2	1	2	2
17	55	F	70	165	25.7117	II	150	180	666	40	1249	T12	0	0	0	0	6	0		1	4	5	4	4		1	4	5	3	2	6	13	3	2	2	3	2
18	44	F	55	165	20.202	II	200	220	686	45	1655	T12	0	0	0	0	7	0		1	3	5	4	4		1	3	5	3	2	7	13	2	2	2	1	2
19	74	M	65	175	21.2245	II	130	150	506	45	1267	T12	0	0	1	0	7	0		1	4	4	4	5		1	4	4	2	1	7	14	2	3	2	1	2
20	48	M	70	171	23.939	I	140	160	500	50	1250	T12	0	0	0	0	6	0		1	4	4	4	4		1	4	4	3	2	7	14	3	2	1	2	2
21	65	M	65	168	23.03	II	150	170	652	45	1490	T12	0	0	0	0	7	0		1	4	4	4	5		1	4	4	4	1	7	14	2	2	2	1	1
22	63	F	58	155	24.1415	II	170	190	632	40	1653	T12	1	0	0	0	6	0		1	4	5	4	4		1	5	5	4	2	7	13	2	2	1	2	1
23	62	F	55	150	24.4444	II	170	220	548	45	1549	T12	1	0	0	0	6	0		1	4	5	4	4		1	4	5	2	2	7	12	3	2	1	1	2
24	59	M	68	170	23.5294	II	190	210	567	45	1653	T12	0	0	0	1	5	0		1	4	5	4	4		1	5	5	4	2	6	13	2	3	2	1	1
25	65	M	64	162	24.3865	II	150	180	789	45	1665	T12	0	0	0	0	6	0		1	4	4	4	4		1	4	4	2	1	6	12	2	1	1	1	1
26	66	F	65	160	25.3906	II	165	190	889	45	1873	T12	0	1	1	0	7	1		1	4	5	4	4		1	4	4	3	1	7	14	2	1	2	1	2
27	64	F	67	164	24.9108	II	175	195	1023	50	1762	T12	0	0	0	1	5	1		1	4	4	3	4		1	5	3	2	2	7	13	2	3	1	1	2
28	58	M	65	163	24.4646	I	160	185	998	45	1982	T12	0	0	0	0	5	0		1	4	4	5	4		1	3	4	4	1	7	13	2	1	2	2	2
29	48	F	50	159	19.7777	II	155	180	1104	45	1763	T12	0	0	0	1	6	0		1	4	4	3	4		1	4	4	3	1	6	12	2	2	1	1	2
30	49	M	66	163	24.841	I	180	210	783	40	1532	T12	0	1	0	0	5	2		1	4	4	3	4		1	3	3	2	1	7	13	2	2	2	2	2
